# Supplementary material for: miR-23∼27∼24 clusters control effector T cell differentiation and function
Source: PubMed Central journal article supplement — J Exp Med. 2016 Feb 8;213(2):235–49. doi: 10.1084/jem.20150990 (PMC4749926; doi:10.1084/jem.20150990), 2016-02-08
Supplement: supp_jem.20150990_JEM_20150990_sm.pdf [file supp_jem.20150990_JEM_20150990_sm.pdf]

SUPPLEMENTAL MATERIAL

Cho et al., <http://www.jem.org/cgi/content/full/jem.20150990/DC1>

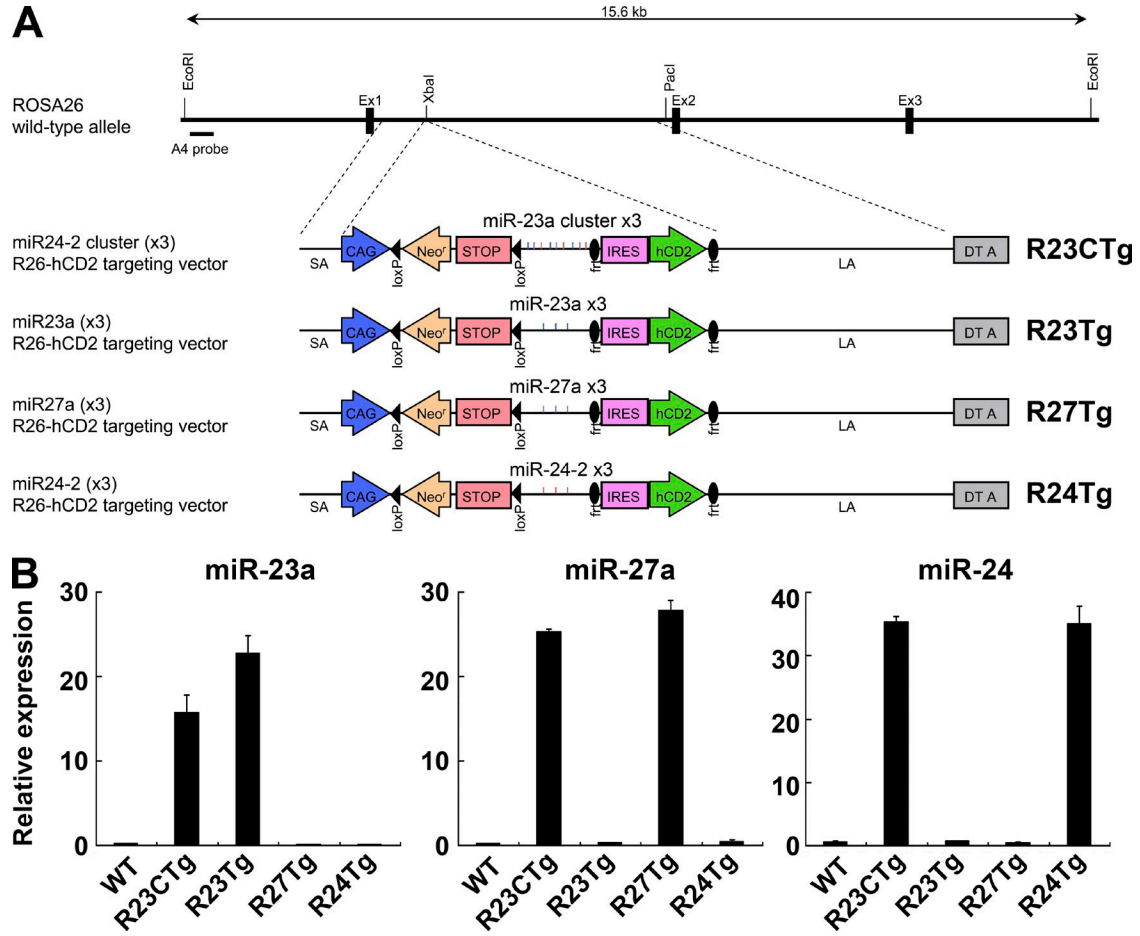

Figure S1. Conditional overexpression of miR-23a cluster in T cells. (A) Schematic representation of the targeting strategy for ROSA Tg. The resultant mice were bred to CD4cre mice to overexpress total or individual members of miR-23a cluster in T cells, respectively. (B) qPCR analysis of relative expressions of miR-23a, miR-27a, and miR-24 in T cells isolated from different ROSA Tg mice. Data are representative of four independent experiments.  $n = 4-8$ .

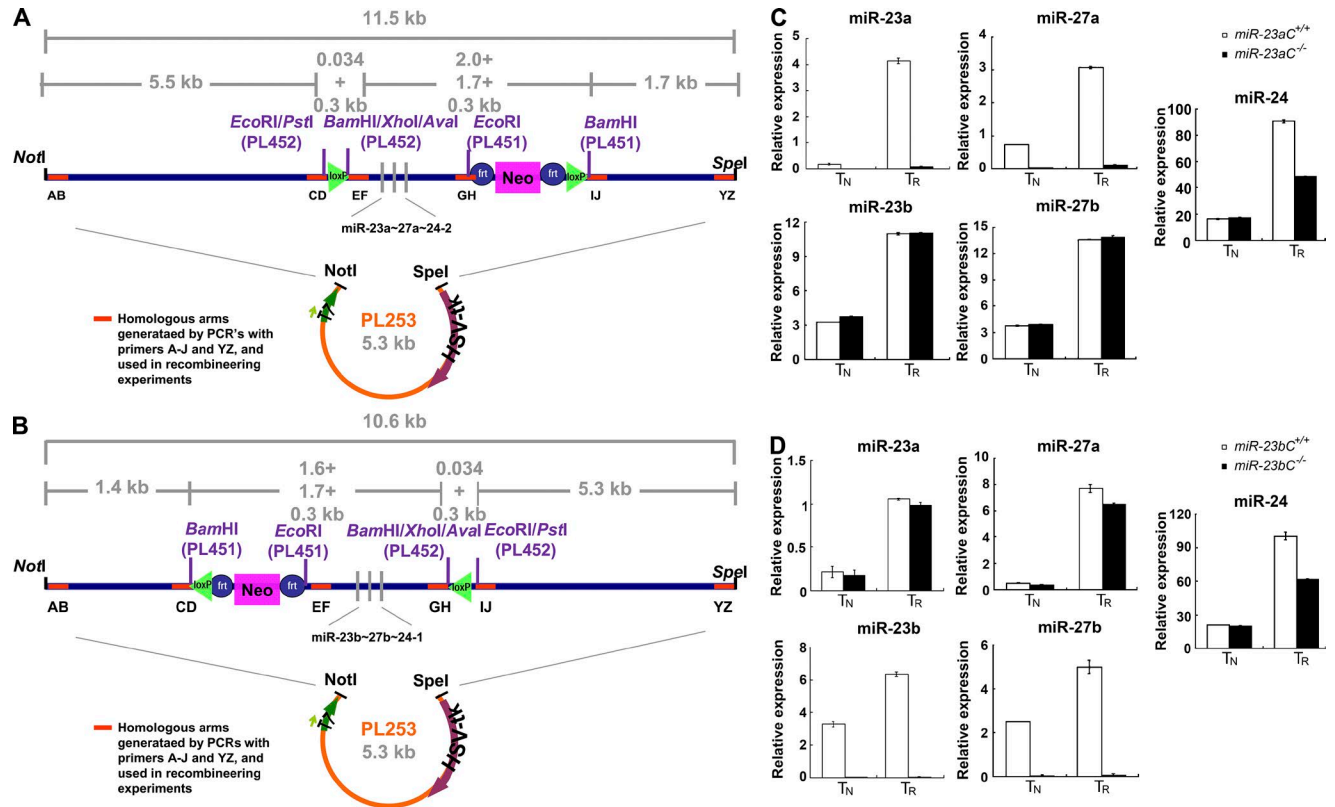

Figure S2. Generation of mice with conditional alleles of miR-23a cluster or miR-23b cluster. Schematic representation of the targeting strategy for miR-23a<sup>C<sup>fl</sup></sup> (A) and miR-23bC<sup>fl</sup> (B) mice, respectively. Expressions of different miRNA members in miR-23a and miR-23b cluster in T reg cells (TR) and naive T cells (TN) is isolated from miR-23aC<sup>-/-</sup> (C) and miR-23bC<sup>-/-</sup> (D) mice. Data are representative of two independent experiments. *n* = 4–6.

Table S1, available as an Excel file, shows miRNA expression profiling analysis in T reg versus effector T cells under different culture conditions.
